# Supplementary material
Source: PubMed Central journal article supplement (PMC5193233)
Supplement: NIHMS828886-supplement.pdf [file NIHMS828886-supplement.pdf]

## CHOP Resuscitation Database: Data Fields for NICU Patients

- Basic Information
  - Event ID
  - Event type
    - Code: CPA
    - Code: ARC
    - Code: ARC progressing to CPA
    - Code: Other
  - Event date
  - Event time
- Patient Information
  - Name
  - Date of birth
  - Sex
  - Medical record number
  - Hospital admission date
- Event Details
  - Main diagnosis at time of event
  - DNR (Do not resuscitate) status at time of event
  - Chest compressions done?
  - Duration of chest compressions
  - Airway support provided?
  - Type of airway support provided
  - Medications administered
  - Reason for code call
- Immediate Disposition
  - Survival status
    - Died during event
    - Survived event, but died within 24 hours
    - Survived more than 24 hours after the event
- Outcomes (completed after patient discharge)
  - Was the patient made DNR after the event?
  - Patient died prior to discharge?
